# Supplementary material for: Soursop (Annona muricata) Properties and Perspectives for Integral Valorization
Source: MDPI journal article supplement (doi:10.3390/foods12071448), 2023-03-29
Supplement: s1 [file s1]

**Table S1**

Soursop products available on the world market.

| Soursop products            | Country | Price range (\$/100g) | Presentation                                                                                      |
|-----------------------------|---------|-----------------------|---------------------------------------------------------------------------------------------------|
| Dried leaves                | German  | 10.00 – 900.00        | Leaf<br>       |
|                             | USA     |                       | Ground<br>     |
|                             | France  |                       | Capsules<br>   |
|                             | Japan   |                       |                                                                                                   |
|                             | Mexico  |                       |                                                                                                   |
|                             | Sweden  |                       |                                                                                                   |
|                             | Brazil  |                       |                                                                                                   |
| Dried Pulp (soursop powder) | Brazil  | 3.00 – 130.00         | Powder<br>    |
|                             | Mexico  |                       | Capsules<br> |
|                             | Japan   |                       |                                                                                                   |
